# Supplementary material
Source: PubMed Central journal article supplement (PMC4073968)
Supplement: tableS1.pdf [file tableS1.pdf]

**Table S1. Summary of variation identified by *S1PR3* re-sequencing in European (ED) and African descent (AD) subjects.**

| SNP # | Position <sup>a</sup> | Location <sup>b</sup>         | rs #              | Flanking (5') | Flanking (3') | MAF in AD <sup>c</sup> | MAF in ED <sup>c</sup> | Val <sup>d</sup> |
|-------|-----------------------|-------------------------------|-------------------|---------------|---------------|------------------------|------------------------|------------------|
| 1     | 90794283              | -1899T>G                      | <b>rs7022797</b>  | GACAGGGATC    | TTAGGGAAC     | 0.39                   | 0.31                   | ‡                |
| 2     | 90794397              | -1785G>C                      | <b>rs11137480</b> | ACTCCTCAGG    | CCTCTGGGCT    | 0.39                   | 0.31                   | ‡                |
| 3     | 90794645              | -1537C>A                      | rs117210461       | TATTGTTATC    | TGGTTGTGAC    | 0                      | 0.04                   | ‡                |
| 4     | 90794806-11           | -1376_-1371dupAGTGCC          | NA                | CTACAGTGCC    | GGAAGACTCC    | 0                      | 0.12                   | -                |
| 5     | 90794814              | -1368G>A                      | rs7022664         | ACAGTGCCGG    | AGACTCCACA    | 0.18                   | 0.38                   | ‡                |
| 6     | 90795129-30           | -1053_-1052insGAATC           | rs10648003        | TTTGACAAAA    | CTCAACTCTC    | 0.36                   | 0.50                   | -                |
| 7     | 90795641              | -541C>A                       | rs7048483         | GGGACCCGCG    | GGAAAAGGAA    | 0.04                   | 0                      | ‡                |
| 8     | 90796342              | c.-236T>A                     | rs11795137        | CCAGCCCATC    | GGCATTTCGAG   | 0                      | 0.08                   | ‡                |
| 9     | 90797066              | c.-148+660A>G                 | <b>rs73654718</b> | GACACTCCCA    | TGGTATATTT    | 0.19                   | 0.08                   | ‡                |
| 10    | 90797090              | c.-148+684T>G                 | NA                | TGTGGTGTTT    | TATATTTGGA    | 0.04                   | 0                      | -                |
| 11    | 90797181              | c.-148+775G>T                 | rs73496033        | GGGAGCTACA    | GAACAGAGAG    | 0.04                   | 0                      | ‡                |
| 12    | 90797198              | c.-148+792A>C                 | rs62551536        | AGAGCTCTTT    | GAAGTTACT     | 0                      | 0.08                   | ‡                |
| 13    | 90797209              | c.-148+803T>G                 | NA                | GAAGTTACT     | TAAATGGAG     | 0                      | 0.04                   | -                |
| 14    | 90797298              | c.-148+892T>C                 | rs73496035        | AATCTGGACA    | TAGAAGTCAC    | 0.04                   | 0                      | ‡                |
| 15    | 90797507              | c.-148+1101C>T                | rs59180453        | GGTGATGGTG    | GGGGCATGTG    | 0.04                   | 0                      | ‡                |
| 16    | 90797534              | c.-148+1128C>T                | rs7863572         | TGTGTGTGTG    | GCGCTTGAGG    | 0.43                   | 0.46                   | ‡                |
| 17    | 90797689              | c.-148+1283C>T                | <b>rs6559331</b>  | CTTTGGGCCCT   | TGAAATCACT    | 0.37                   | 0.29                   | ‡                |
| 18    | 90797872              | c.-148+1466dupA               | <b>rs11398943</b> | CATATACAAA    | GGGTAGAGAC    | 0.43                   | 0.38                   | -                |
| 19    | 90798329              | c.-148+1923T>A                | rs79303380        | CTCTGCCATA    | GTTTTCTGCC    | 0.04                   | 0                      | ‡                |
| 20    | 90798448              | c.-148+2042C>T                | rs10867149        | GTTAATAACA    | GTTTCAGTTG    | 0.39                   | 0.42                   | ‡                |
| 21    | 90798465              | c.-148+2059C>T                | rs73496042        | GTTGATGTTA    | TGTTATAGCT    | 0.04                   | 0                      | ‡                |
| 22    | 90798974              | c.-148+2568delC               | NA                | GACACCCCCC    | TCCCCAGCC     | 0                      | 0.12                   | -                |
| 23    | 90799235              | c.-148+2829C>T                | rs41304228        | AATCATTTAT    | CTATGCTGTC    | 0                      | 0.04                   | ‡                |
| 24    | 90799458              | c.-148+3052A>C                | NA                | CAGATAGCTC    | TAATGTCCCA    | 0.04                   | 0                      | -                |
| 25    | 90799625              | c.-148+3219G>A                | NA                | ATTTCTCAGG    | GAGCTGCATT    | 0.04                   | 0                      | -                |
| 26    | 90800116              | c.-148+3710C>T                | rs73496046        | GTAGAGAAAG    | GAATCGCTAG    | 0.04                   | 0                      | ‡                |
| 27    | 90800363              | c.-148+3957G>A                | rs3934594         | AGCTTAGTGA    | GATGACATGA    | 0.25                   | 0.46                   | ‡                |
| 28    | 90800415              | c.-148+4009T>G                | <b>rs11137481</b> | AGAACTCAGG    | AAGTTCAGAT    | 0.21                   | 0.04                   | ‡                |
| 29    | 90800633              | c.-148+4227T>C                | rs115138747       | AGCATCTGTA    | TGGTTAGAAG    | 0.04                   | 0                      | ‡                |
| 30    | 90800748              | c.-148+4342A>G                | NA                | TAGTCTGCAA    | AAGCCATATG    | 0.04                   | 0                      | -                |
| 31    | 90800749              | c.-148+4343G>A                | <b>rs7045576</b>  | AGTCTGCAAA    | AGCCATATGT    | 0.07                   | 0.42                   | ‡                |
| 32    | 90801370-2            | c.-147-4419_-147-4417delGTG   | NA                | GGGACAGGTG    | ACTAGGAGGG    | 0                      | 0.04                   | -                |
| 33    | 90801401              | c.-147-4388G>C                | <b>rs6559333</b>  | AAGGCTGCAG    | GTCCGGCCCA    | 0.25                   | 0.08                   | ‡                |
| 34    | 90802459              | c.-147-3330G>A                | rs7858626         | GTATCCCAGC    | ATCTGTAGGA    | 0.32                   | 0.46                   | ‡                |
| 35    | 90802700              | c.-147-3089C>T                | NA                | GAGAGCCCT     | GCGGTCCCA     | 0.04                   | 0                      | -                |
| 36    | 90802703              | c.-147-3086G>A                | <b>rs7870888</b>  | GAGCCCTCGC    | GTCCCATCA     | 0.04                   | 0.12                   | ‡                |
| 37    | 90802886              | c.-147-2903T>C                | <b>rs7038457</b>  | ATTCTCAGT     | CCTGTTTACA    | 0.36                   | 0.15                   | ‡                |
| 38    | 90802906              | c.-147-2883A>C                | NA                | AGATAAAGAA    | GAAAGAAATA    | 0.04                   | 0                      | -                |
| 39    | 90803463              | c.-147-2326C>G                | <b>rs58235552</b> | CAGGGGCTGG    | ATGATTCCAG    | 0.21                   | 0.12                   | ‡                |
| 40    | 90803547              | c.-147-2242G>A                | NA                | AATCAGAAAC    | GTAGAGAGGG    | 0.04                   | 0                      | -                |
| 41    | 90804006              | c.-147-1783G>A                | rs76590495        | GGTTCCAGA     | CAACCAACAC    | 0.14                   | 0                      | ‡                |
| 42    | 90804199              | c.-147-1590A>C                | <b>rs73496049</b> | CCACCCAGGC    | AGCCCTGGAT    | 0.11                   | 0.04                   | ‡                |
| 43    | 90804466-8            | c.-147-1323_-147-1321dupGTG   | NA                | GGGTGCGGTG    | TCTCATGCCT    | 0.04                   | 0                      | -                |
| 44    | 90804595              | c.-147-1194T>C                | NA                | AAATTAGCCA    | GCATGGTGCC    | 0.11                   | 0                      | -                |
| 45    | 90804777-81           | c.-147-1012_-147-1008delAATAA | NA                | AATAAAATAA    | GTGAGTCCAC    | 0.11                   | 0                      | -                |
| 46    | 90804984              | c.-147-805C>T                 | rs116473341       | TGCCACTTTT    | TGTTGGCTCA    | 0.11                   | 0                      | ‡                |
| 47    | 90805081-4            | c.-147-708-147-705delCCTT     | NA                | TCCTGTCTTT    | TATCATCTGT    | 0.04                   | 0                      | -                |
| 48    | 90805320-2            | c.-147-469-147-467delTTC      | NA                | GTGCGGGATC    | CCACGATGTC    | 0                      | 0.19                   | -                |
| 49    | 90805677              | c.-147-112A>C                 | rs41287345        | TGACGTGGCT    | GCCATCCCAG    | 0.04                   | 0                      | ‡                |
| 50    | 90805687              | c.-147-102G>A                 | NA                | AGCCATCCCA    | TACTTCCACG    | 0.04                   | 0                      | -                |
| 51    | 90806433              | c.498C>T (p.Phe166Phe)        | NA                | TCATTGCCTT    | ACGCTGGGCG    | 0.04                   | 0                      | -                |
| 52    | 90806565              | c.630C>G (p.Thr210Thr)        | rs34962307        | TCCTGGTGAC    | ATCGTGATCC    | 0.11                   | 0                      | ‡                |
| 53    | 90806663              | c.728G>A (p.Arg243Gln)        | rs34075341        | GCACTGCTGC    | GACCGTGGTG    | 0.04                   | 0.12                   | ‡                |
| 54    | 90807075              | *3G>A                         | NA                | GCAACTGATC    | TCTCCATGCG    | 0                      | 0.04                   | -                |
| 55    | 90807194              | c.*122G>A                     | <b>rs73496050</b> | AGCCTGCCCA    | TGTGGATGTC    | 0.25                   | 0                      | ‡                |

|    |             |                      |                  |            |            |      |      |   |
|----|-------------|----------------------|------------------|------------|------------|------|------|---|
| 56 | 90807340    | c.*268C>T            | rs117135373      | ATCCTAGACA | CCTCCCTGTT | 0    | 0.12 | ‡ |
| 57 | 90807402    | c.*330G>A            | rs41287349       | GACCCCTCC  | TGTGCCTCTG | 0.39 | 0    | ‡ |
| 58 | 90807494    | c.*422G>A            | NA               | ATGTTACACA | AATTTGTGTT | 0.07 | 0    | - |
| 59 | 90807509    | c.*437G>T            | NA               | TGTGTTGCAG | TGTTTGCCAT | 0.04 | 0    | - |
| 60 | 90807692    | c.*620C>T            | rs41287351       | TTCAAATTCC | CAAAAAGGCT | 0    | 0.12 | ‡ |
| 61 | 90807922    | c.*850A>G            | rs7853537        | AAGCAGAAGC | GACGGCTGGC | 0.25 | 0.15 | ‡ |
| 62 | 90807919-24 | c.*847_*852dupAGCAGA | NA               | CAGAAGCAGA | CGGCTGGCCT | 0.04 | 0    | - |
| 63 | 90807926    | c.*854G>A            | rs7865415        | AGAAGCAGAC | GCTGGCCTGG | 0.14 | 0    | ‡ |
| 64 | 90808344    | c.*1272A>G           | rs41287355       | TTCCCAAGG  | TTGTACGTAT | 0.04 | 0    | ‡ |
| 65 | 90808518    | c.*1446C>T           | rs117145268      | GAGCATTTGC | TGAATAAAAC | 0    | 0.12 | ‡ |
| 66 | 90808722    | c.*1650delC          | NA               | AGATCTTCCC | AGGAGCATTT | 0.04 | 0    | - |
| 67 | 90808951    | c.*1879T>C           | NA               | CTGGCCAACA | AGTGAATCC  | 0.18 | 0    | - |
| 68 | 90809094    | c.*2022A>G           | rs1129925        | AGATCGACC  | CTGCACTCCA | 0.29 | 0.42 | ‡ |
| 69 | 90809249    | c.*2177T>C           | rs77515659       | ATCTGTGTTA | AGTTATGAGT | 0.11 | 0    | ‡ |
| 70 | 90809604    | c.*2532C>T           | <u>rs1867</u>    | AAGCCCTAAC | TTGAAGTTTG | 0.04 | 0.15 | ‡ |
| 71 | 90809871    | *126A>G              | rs114837647      | CAGGAATTAA | CCACATTCAG | 0.11 | 0    | ‡ |
| 72 | 90809944    | *199G>A              | <u>rs9314668</u> | TTAATGAAGC | TCTGTGCCTT | 0.04 | 0.15 | ‡ |
| 73 | 90810315    | *570dupT             | NA               | AAGGTGAGTT | CTCTAGGAGT | 0.04 | 0    | - |
| 74 | 90810497    | *752A>G              | NA               | CCATCATCCA | ATGAAAGATA | 0.04 | 0    | - |
| 75 | 90811017    | *1272A>G             | <u>rs7865979</u> | AGAGTGAAGG | ATCCCTGTGG | 0.07 | 0.42 | ‡ |
| 76 | 90811043    | *1298G>A             | NA               | TCAAAAGGGA | GAGGGAATTT | 0.04 | 0    | - |
| 77 | 90811081    | *1336C>G             | rs118017965      | CTGCTGTATT | TCAAATCTCC | 0    | 0.12 | ‡ |
| 78 | 90811225    | *1480G>A             | rs76432254       | AGAAAGTGGT | AATTGGCAAT | 0.04 | 0    | ‡ |
| 79 | 90811237    | *1492C>T             | NA               | ATTGGCAATA | GCCAAGACAT | 0.04 | 0    | - |
| 80 | 90811270    | *1525dupT            | NA               | AATTCTTTT  | GTTTCACAAA | 0.04 | 0    | - |

<sup>a</sup>Position in chromosome 9 according to NCBI build 36

<sup>b</sup>With respect to reference sequence NM\_005226.2

<sup>c</sup>Minor allele frequency in re-sequencing

<sup>d</sup>Validation status: frequency available, ‡; unknown or by 2-hit as in dbSNP build 135

Selected SNPs for genotyping are underlined and in bold
